# Supplementary material
Source: PubMed Central journal article supplement (PMC6726997)
Supplement: ajcr0009-1607-f9.pdf [file ajcr0009-1607-f9.pdf]

# HSF2 regulates aerobic glycolysis by suppression of FBP1 in HCC

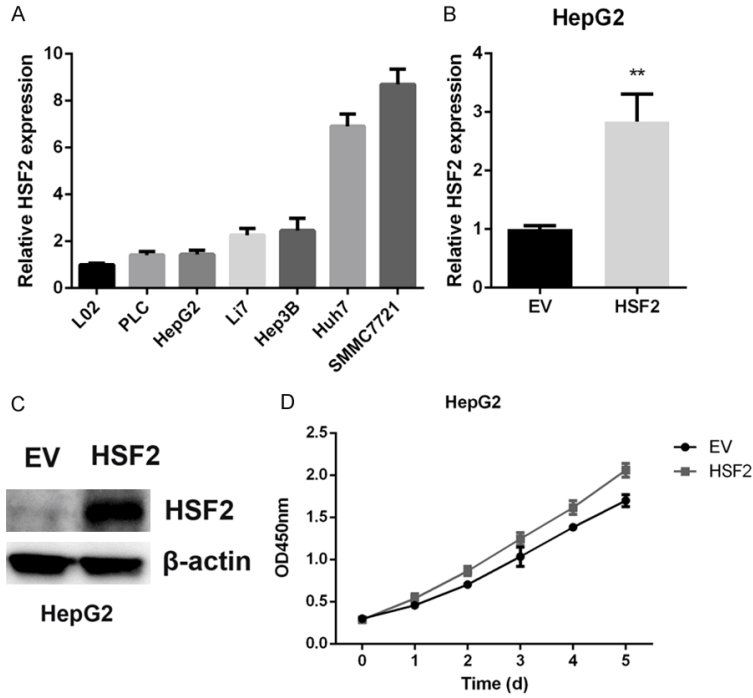

**Figure S1.** A. mRNA expression of HSF2 in normal liver cells and liver cancer cells. B and C. HSF2 was overexpressed in HepG2 cells. D. Introduction of HSF2 into HepG2 cells increased cell proliferation of HepG2 cells, as reflected by CCK-8 assay.

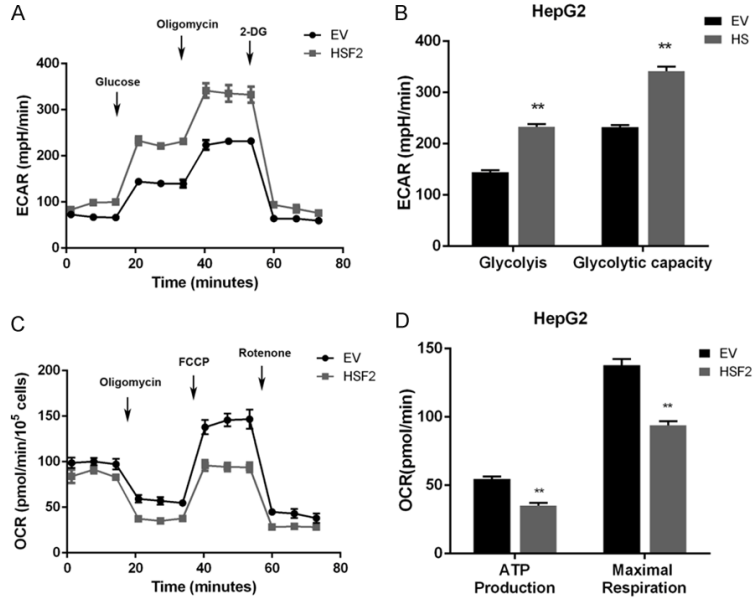

**Figure S2.** A and B. Overexpressing HSF2 increased glycolysis capacity of HepG2 cells, as reflected by ECAR examination. C and D. HSF2 introduction into HepG2 cells attenuated mitochondrial respiration, as measured by OCR.
